# Supplementary material for: A Survey on Association Rule Mining for Enterprise Architecture Model Discovery
Source: Springer Nature journal article supplement (doi:10.1007/s12599-023-00844-5), 2023-12-21
Supplement: MOESM1 [file 26558048]

# **A Survey on Association Rule Mining for Enterprise Architecture Model Discovery**

**Carlos Pinheiro, Sergio Guerreiro, Henrique São Mamede**

Business & Information Systems Engineering (2023)

**Appendix (available online via <http://link.springer.com>)**

## Appendix A: Algorithm Comparison

**Table 8** The latest and most cited algorithms for general ARM

| Algorithms                            | Publication/Year                            | Surpassed Algorithms                                                                                                                                |
|---------------------------------------|---------------------------------------------|-----------------------------------------------------------------------------------------------------------------------------------------------------|
| <b>General Frequent Pattern</b>       |                                             |                                                                                                                                                     |
| Apriori                               | Agrawal et al 1993                          | It was seminal, not comparable with any other previous ones.                                                                                        |
| FP-Growth                             | Han et al 2000                              | Apriori, according to Luna et al 2019. FP-Growth performed better than Apriori and even better than Apriori multi-threaded (Lin et al 2020).        |
| dECLAT                                | Zaki and Gouda 2003                         | Apriori, FP-Growth, ECLAT (Zaki 2000), according to Luna et al 2019.                                                                                |
| LCM                                   | Uno et al 2004                              | According to Luna et al 2019, the winner of FIMI'04.                                                                                                |
| MPSoC                                 | Sinaei and Fatemi 2018                      | Compared with a previous version, according to authors.                                                                                             |
| NOV-CFI                               | Phan 2018                                   | According to the author, CHARM (Zaki and Hsiao 2002), NAFCP (Le and Vo 2015).                                                                       |
| MTARM (MT-Eclat)                      | Yildirim Taşer et al 2020                   | The author compared different versions of the algorithm. The MT-Eclat version performed better than MT-FP-growth, which was better than MT-Apriori. |
| EFPT-IKD                              | Liu et al 2022                              | According to the author, FUP (Cheung et al 1997), PARMTRD (Liu et al 2018).                                                                         |
| <b>Temporal or Sequential Pattern</b> |                                             |                                                                                                                                                     |
| LA-FEMH                               | Ao et al 2019                               | PEM (Ao et al 2019).                                                                                                                                |
| <b>Tax et al Algorithm 1 e 2</b>      | Tax et al 2018                              |                                                                                                                                                     |
| AprioriAll                            | Agarwal et al 2000, cited by Gan et al 2019 | Not compared with other algorithms.                                                                                                                 |
| HBST                                  | Aggarwal and Toshniwal 2018                 | Compared by the authors with an adaptation of Apriori.                                                                                              |

**Table 9** The latest algorithms focused on quality and utility

| Algorithms                                               | Year                | Surpassed Algorithms                                                                                 |
|----------------------------------------------------------|---------------------|------------------------------------------------------------------------------------------------------|
| <b>Rising the Accuracy, Quality, and Utility of Rule</b> |                     |                                                                                                      |
| HUI-PR                                                   | Wu et al 2019       | D2HUP (Liu et al 2012) and EFIM algorithms (Zida et al 2015)                                         |
| LA-FEMH+                                                 | Ao et al 2019       | Improved version of the LA-FEMH algorithm by the same authors.                                       |
| BaCARO-II                                                | da Cunha et al 2018 | It is ARM inspired by GA (Genetic Algorithm) but not compared to other ARM, but rather to other GAs. |

**Table 10** The last algorithms focused on parallel, multi-thread and distributed computing

| Algorithms                       | Year                                          | Surpassed Algorithms                                                                            |
|----------------------------------|-----------------------------------------------|-------------------------------------------------------------------------------------------------|
| <b>Parallel and Multi-Thread</b> |                                               |                                                                                                 |
| MPSoC                            | Sinaei and Fatemi 2018                        |                                                                                                 |
| Kavosh                           | Barkhordari and Niamanesh 2018                | FiDooop (Xun et al 2016), Sequence-Growth (Liang and Wu 2015)                                   |
| GPU-SingleScan                   | Djenouri et al 2019, cited by Luna et al 2019 | BigFIM (Moens et al 2013), PFP (Li et al 2008)                                                  |
| <b>Distributed</b>               |                                               |                                                                                                 |
| NOV-CFI                          | Phan 2018                                     |                                                                                                 |
| BIGMiner                         | Chon and Kim 2018, cited by Luna et al 2019   | SPC (Lin et al 2012), PFP (Li et al 2008) , BigFIM (Moens et al 2013)                           |
| MRQAR                            | Martín et al 2018                             | PFP (Li et al 2008)                                                                             |
| G3P-LSC                          | Padillo et al 2018, cited by Luna et al 2019  | Apriori, Eclat, and thirteen other algorithms that were not mentioned in this literature review |
| FDM                              | Cheung et al 1996b, cited by Luna et al 2019  | An Apriori version for the parallel mining by Agrawal and Shafer (1996)                         |

## Appendix B: Complete list of Papers Analyzed and Data Extraction

| File Name                  | Description                                                                                          | URL                                                                                                   |
|----------------------------|------------------------------------------------------------------------------------------------------|-------------------------------------------------------------------------------------------------------|
| Part 1-articles export.xls | It contains the list of papers returned in the search bases and the result of the selection for RQ 1 | <a href="https://figshare.com/s/194c10be9fe430b6821a">https://figshare.com/s/194c10be9fe430b6821a</a> |
| Part 1-data_extraction.xls | It contains the result of data extraction for RQ 1                                                   | <a href="https://figshare.com/s/004d1eadef32483aa2cb">https://figshare.com/s/004d1eadef32483aa2cb</a> |
| Part 2-articles export.xls | It contains the list of papers returned in the search bases and the result of the selection for RQ 2 | <a href="https://figshare.com/s/7d96ff7d44b581b063c3">https://figshare.com/s/7d96ff7d44b581b063c3</a> |
| Part 2-data_extraction.xls | It contains the result of data extraction for RQ 2                                                   | <a href="https://figshare.com/s/194c10be9fe430b6821a">https://figshare.com/s/194c10be9fe430b6821a</a> |
